# Supplementary material for: Different Infectivity of Mediterranean and Southern Asian Tomato Leaf Curl New Delhi Virus Isolates in Cucurbit Crops
Source: MDPI journal article supplement (doi:10.3390/plants11050704), 2022-03-06
Supplement: s1 [file s1]

**Table S1:** Primer sets for infectious clone construction of ToLCNDV-ES.

| Primer name | Sequence (5'-3')                | Target size |
|-------------|---------------------------------|-------------|
| I-A-1-F     | AAGCTTAAAACGTGTCGTTTCGATCTGG    | 725bp       |
| I-A-1-R     | CTCGAGTAACATCACTAACACAC         |             |
| I-A-2-F     | CTCGAGGCACCGGACTCAC             | 2292bp      |
| I-A-2-R     | ACTAGTGTTTGTGGATCCAACTTGGTGAG   |             |
| I-B-1-F     | AAGCTTTTAGGGAGCGCAGCGACAC       | 2084bp      |
| I-B-1-R     | GGTACCCTATATGGCTATAGGT          |             |
| I-B-2-F     | GGTACCCTTAACGATCTTGAAC          | 1586bp      |
| I-B-2-R     | ACTAGTCTACAAAAGATAACGAATGGCAAAT |             |

**Table S2:** Primer sets for infectious clone construction of ToLCNDV-India.

| Primer name | Sequence (5'-3')              | Target size |
|-------------|-------------------------------|-------------|
| Pa-A-1-F    | AAGCTTCCATAAAACTTGTCGTTTCGATC | 1336bp      |
| Pa-A-1-R    | GGTACCTAAATATGCTTGGTGTA       |             |
| Pa-A-2-F    | GGTACCTAAGGACCTGCGT           | 1687bp      |
| Pa-A-2-R    | ACTAGTGTTTGTGGATCCGAACTTGGT   |             |
| Pa-B-1-F    | AAGCTTATTGGCCGCGCAGCGGA       | 1248bp      |
| Pa-B-1-R    | CATATGACGTCACGCATCGAT         |             |
| Pa-B-2-F    | CATATGTATCATATCCTGCAAAGAC     | 2432bp      |
| Pa-B-2-R    | ACTAGTTTAGCTGGGATAAGAAATGTGTG |             |
